# Supplementary material
Source: MDPI journal article supplement (https://www.mdpi.com/2072-4292/10/2/301)
Supplement: s1 [file s1]

**NASA Scientific and Technical Information (STI)  
Document Availability Authorization (DAA)**

|                     |                            |                              |
|---------------------|----------------------------|------------------------------|
| <b>NF 1676L ID:</b> | <b>Date Submitted:</b>     | <b>NF 1676L New/Revised:</b> |
| 29138               | 12/21/2017                 | New                          |
| <b>STI Type:</b>    | <b>NF 1676L Submitter:</b> |                              |
| Journal Article     | Childs-Gleason, Lauren     |                              |

**Authors, Editors, and Compilers**

| Order | Person Type | Name            | Affiliation                | Phone          |
|-------|-------------|-----------------|----------------------------|----------------|
| 1     | Author      | Xu, Yaping      | Louisiana State University |                |
| 2     | Author      | Ross, Kenton W  | NASA                       | (757) 864-3595 |
| 3     | Author      | Liu, Cuiling    | Louisiana State University |                |
| 4     | Author      | Berry, Kimberly | DEVELOP Wise               |                |

**Title:**

Standardized Soil Moisture Index for Drought Monitoring Based on SMAP Observations and 36 Years of NLDAS  
Data: A Case Study in the Southeast United States

**Originating NASA Center**

Langley Research Center

**Org Code:**

E3

**WBS:**

970315.02.02.01.01

**Subject Category Number:**

43 Earth Resources And Remote Sensing

**Security Classification:**

Unclassified

**Availability:**

Publicly Available

**Does This Document Contain New Technology:**

No

**Does This Document Contain Any Third-Party Content:**

No

**Document Submittal:**

Author intends to submit their document electronically only

**Journal Name:**

Remote Sensing

**Document Type/Dissemination Authority**

PREPRINT (draft or revision being sent to journal)

» Only the Publisher

**Publication Date:**

**Beginning Page Number: Ending Page Number:**

**Journal Volume**

**Journal Number**

**Abstract:**

Droughts can severely reduce the productivity of agricultural lands and forests. The United States Department of Agriculture (USDA) Southeast Regional Climate Hub (SERCH) has launched the Lately Identified Geospecific Heightened Threat System (LIGHTS) to inform its users of potential water deficiency threats. The system identifies droughts and other climate anomalies such as extreme precipitation and heat stress. However, the LIGHTS model lacks input from soil moisture observations. This research aims to develop a simple and easy-to-interpret soil moisture and drought warning index - Standardized Soil Moisture Index (SSI) - by fusing the space-borne Soil Moisture Active Passive (SMAP) soil moisture data with the NLDAS climate index. Ground truth soil moisture data from the Soil Climate Analysis Network (SCAN) were collected for validation. As a result, the accuracy of using SMAP to monitor soil moisture content generally displayed a good statistical correlation with the SCAN data. The validation through the Palmer Drought Severity Index (PDSI) and Normalized Difference Water Index (NDWI) suggested that SSI was effective and sensitive for short-term drought monitoring across large areas.

**Author's Comments:**

**Blanket Authorization:**

No

**Approval Status:**

| Approver Type               | Approver       | Status            |
|-----------------------------|----------------|-------------------|
| Branch Head                 | Ko, Malcolm K  | Approved 12/21/17 |
| Organizational Unit Manager | Ko, Malcolm K  | Approved 12/21/17 |
| Center Export Administrator | Dee, Kevin E   | Approved 12/21/17 |
| Publications Manager        | Baize, Wanda M | Approved 12/21/17 |

NASA FORM 1676L OCT 2009  
Previous editions obsolete

Prescribing Documents NPR 2200.2 and LMS-CP-5904
